# 1        **Deciphering the function of intrinsic and genomics-driven epigenetic** 2        **heterogeneity in head and neck cancer progression with single-nucleus** 3        **CUT&RUN**

## 5        **Running title**

6        Impact of the epigenome on HNSCC progression

## 8        **Authors**

9        Howard J. Womersley,<sup>1†</sup>, Daniel Muliaditan,<sup>2,3†</sup>, Ramanuj DasGupta,<sup>3\*</sup>, Lih Feng Cheow<sup>1,2\*</sup>

## 11       **Affiliations**

12       <sup>1</sup>Institute for Health Innovation and Technology, National University of Singapore, Singapore  
13       117599.

14       <sup>2</sup>Department of Biomedical Engineering, Faculty of Engineering, National University of Singapore,  
15       Singapore 117583.

16       <sup>3</sup>Genome institute of Singapore, Agency for Science, Technology and Research, Singapore 138672.

17       † These authors contributed equally to this work.

- 18       • Correspondence and request for materials should be addressed to R.D.G. ([dasguptar@gis.a-](mailto:dasguptar@gis.a-star.edu.sg)  
19       [star.edu.sg](mailto:dasguptar@gis.a-star.edu.sg)) or L.F.C. ([bieclf@nus.edu.sg](mailto:bieclf@nus.edu.sg)).

## 21       **Email addresses**

22       Howard J. Womersley: [howard@nus.edu.sg](mailto:howard@nus.edu.sg); Daniel Muliaditan: [Daniel\\_Muliaditan@gis.a-](mailto:Daniel_Muliaditan@gis.a-star.edu.sg)  
23       [star.edu.sg](mailto:Daniel_Muliaditan@gis.a-star.edu.sg); Ramanuj DasGupta: [dasguptar@gis.a-star.edu.sg](mailto:dasguptar@gis.a-star.edu.sg); Lih Feng Cheow: [bieclf@nus.edu.sg](mailto:bieclf@nus.edu.sg).

## Abstract

Interrogating regulatory epigenetic alterations during tumor progression at the resolution of single cells has remained an understudied area of research. Here we developed [the a](#) highly sensitive single-nucleus CUT&RUN (snCUT&RUN) assay to profile histone modifications in isogenic primary, metastatic, and cisplatin-resistant head and neck squamous cell carcinoma (HNSCC) patient-derived tumor cell lines. We find that the epigenome can be involved in diverse modes to contribute towards HNSCC progression. First, we demonstrate that gene expression changes during HNSCC progression can be co-modulated by alterations in both copy number and chromatin activity, driving epigenetic rewiring of cell-states. Furthermore, intratumour epigenetic heterogeneity (ITeH) may predispose sub-clonal populations within the primary tumour to adapt to selective pressures and foster the acquisition of malignant characteristics. In conclusion, snCUT&RUN serves as a valuable addition to the existing toolkit of single-cell epigenomic assays and can be used to dissect the functionality of the epigenome during cancer progression.

## Introduction

Tumour metastasis and acquired drug resistance are key steps in cancer progression that ultimately lead to treatment failure and patient mortality. To identify novel modalities to prevent cancer progression and improve patient survival, it is important to understand the underlying mechanisms that drive these processes. To date, efforts to comprehend the basis of cancer progression have largely focused on uncovering genetic alterations within a tumour population that exert selective fitness, which allows cells to survive during drug treatment. However, cancers can exhibit marked cell-to-cell variation (intra\_tumour heterogeneity or ITH) in gene expression and their functional phenotypes that cannot always be explained by mutations or structural variations in their DNA. Non-genetic basis for ITH suggests a potential role for epigenetic mechanisms driving transcriptomic/phenotypic heterogeneity (Brock et al. 2009). Epigenetic alterations offer a heritable mechanism for generating ITH (Easwaran et al. 2014) and occur at greater frequencies in human cancers than genetic mutations (Guo et al. 2019), thereby underscoring the importance of

51 interrogating them when mapping trajectories of cellular plasticity-driven tumour evolution to  
52 metastatic or treatment-resistant disease. Cancer cells that survive sub-lethal challenges can often  
53 activate stress response pathways which confer early developmental, stem-like features that enable  
54 them to cope with further insults (Pisco and Huang 2015). These pro-survival alterations are often  
55 manifested in the aberrant modification of histone proteins (Füllgrabe et al. 2011). Furthermore,  
56 dysfunction in histone-modifying enzymes have been shown to have a causal relationship with cancer  
57 initiation and progression (Wang et al. 2016). Thus, understanding the underlying epigenetic  
58 mechanisms that underpin the evolution of cancer is crucial for the discovery of alternative  
59 therapeutic interventions to halt or delay its progression and to improve the survival of cancer patients  
60 in the clinic.

61 One such cancer type where epigenetic ITH remains an understudied area of research is  
62 head and neck squamous cell carcinoma (HNSCC). Single cell studies on HNSCC mainly focused  
63 on transcriptomic ITH, underscoring the need to investigate epigenetic control of ITH in HNSCC  
64 (Puram et al. 2017; Quah et al. 2023; Choi et al. 2023; Qi et al. 2021). An area where epigenetic ITH  
65 can have a role in HNSCC progression is in the alterations of histone modifications. Histone  
66 modifications can occur rapidly as cells respond and adapt to the environment. Classically these  
67 changes are identified by chromatin immunoprecipitation followed by sequencing (ChIP-seq).  
68 However, classical ChIP-seq is only suitable for bulk cell assays, which have limited application for  
69 discerning epigenetically distinct subpopulations within tumours. This makes it difficult to determine  
70 whether plasticity or lineage transitions are a result of Darwinian selection of rare, pre-existing  
71 clones; or adaptation, where dynamic epigenetic changes may activate distinct transcriptomic  
72 programs that lead to the emergence of new phenotypes. Thus, there is a need for studies employing  
73 methodologies that can detect histone modifications at the resolution of single cells in order to answer  
74 questions related to how epigenetic heterogeneity and plasticity may drive cell-state transitions during  
75 HNSCC progression. Importantly, given that many readers and writers of different histone marks are  
76 amenable to pharmacological interventions (Helin and Dhanak 2013; Kakiuchi et al. 2021), a greater

77 understanding of their regulatory function during tumour ~~evolution~~progression could result in the  
78 identification of new therapeutic intervention strategies for HNSCC patients.

79           Methods for profiling histone modifications or transcription factors in single cells generally  
80 involve either immunoprecipitation, using an antibody immobilized nuclease or an antibody  
81 immobilized transposase – as exemplified by scChIP-seq, uliCUT&RUN and scCUT&Tag,  
82 respectively (Grosselin et al. 2019; Hainer et al. 2019; Kaya-Okur et al. 2019). Due to the paucity of  
83 DNA within single cells and the implicit requirement for selection of only a tiny fraction of this  
84 material, these methods and others tend to have low numbers of filtered reads and/or poor specificity.  
85 Single cell ChIP-seq methods employ microfluidic devices to compartmentalize single cells, and  
86 although thousands of cells can be analyzed simultaneously the number of unique reads per cell tends  
87 to be low due to inefficient reactions within individual droplets. Additionally, the requirement for  
88 special equipment limits the adoption of this approach by the wider scientific community. On the  
89 other hand, the use of immobilized transposases has generated significantly more traction (Ai et al.  
90 2019; Carter et al. 2019; Wang et al. 2019), largely because these methods do not require a library  
91 preparation stage that normally leads to additional loss of already scarce material. However  
92 considerable off-target transposase binding occurs without stringent salt washes, which can  
93 inadvertently detach proteins of interest from DNA unless they are tightly bound (Kaya-Okur et al.  
94 2020). CUT&RUN was developed as an alternative to ChIP-seq that exhibits significantly less  
95 background noise (Skene and Henikoff 2017), which enables it to profile as few as a 100 cells (Skene  
96 et al. 2018). A single cell version - uliCUT&RUN - was demonstrated to localize NANOG and SOX2  
97 transcription factors (TF) in rare populations of mouse embryonic stem cells (Hainer et al. 2019).  
98 However the extensive sequencing depth required for this method makes it impractical for analyzing  
99 large numbers of single cells (Patty and Hainer 2021).

100           In this manuscript, we developed single nucleus CUT&RUN (snCUT&RUN) assay to  
101 profile histone modifications in single nuclei of HNSCC tumour cells. Interrogating isogenic patient-  
102 derived cell lines (PDC) representing primary, metastatic and cisplatin-resistant tumour cell lines  
103 from HNSCC (Chia et al. 2017), we found that H3K4me3 expression remains relatively stable across

104 the distinct evolutionary states. In contrast, H3K27ac modifications were more pronounced and  
105 exhibited more divergence corresponding with global changes in acetylation in progressed tumour  
106 states. Overall, the same cell types from different patients displayed unique epigenetic profiles –  
107 indicating distinct events may have led to the development of the primary tumour, and subsequently  
108 their progression to metastatic and drug resistant states. Notably, snCUT&RUN inferred the presence  
109 of copy number variations in regions with histone modifications. We found that specific differences  
110 in histone modification can be accentuated by genetic copy number alterations (CNA) between cancer  
111 cells, suggesting that modulation of the cellular epigenome by genetic aberrations could represent an  
112 additional mechanism for cancer progression. Furthermore, we discovered that intratumour  
113 epigenetic heterogeneity (ITeH) may give rise to subpopulations within primary cells that mimic the  
114 metastatic and/or drug-resistant cell states. This subset of cells, undetected by bulk approaches, may  
115 be epigenetically primed to transition to a progressed state. H3K27ac modification in single cells of  
116 the progressed states displayed stress response signatures, suggesting that dynamic alterations of the  
117 epigenome upon drug insults could underlie adaptational changes in their transcriptome and  
118 phenotype. Altogether, we demonstrate that high resolution profiling of histone modifications in  
119 single cells with snCUT&RUN can yield valuable insights into epigenetic heterogeneity in HNSCC,  
120 complementing existing single cell transcriptomic studies.

## 121 **Results**

### 122 **Development and performance of single nucleus CUT&RUN**

123 Tagmentation-based methods for single cell histone modification profiling (e.g.,  
124 scCUT&TAG) have limitations with efficiency for the following reasons: 1) two independent  
125 transposition reactions are needed to create a sequenceable fragment, 2) productive reactions require  
126 that the adapters introduced by transposition on each end of the fragment to be of different “types” –  
127 which only happens with 50% probability. As such, the median unique read counts from methods  
128 such as scCUT&Tag tend not to exceed 10,000 which limits the detection of subtle epigenetic  
129 changes in many applications. Considering these challenges, we focused on the nuclease-based  
130

131 protocol – CUT&RUN. Unlike transposon-based methods which get expended during the reaction, a  
132 single pA-MN enzyme in CUT&RUN can catalyze fragmentation of DNA on both sides of a given  
133 nucleosome. This means that after digestion, all fragments have the potential to yield sequenceable  
134 product after the library preparation stage. Although the library preparation protocol is more complex  
135 compared to scCUT&TAG, we believe that the increased sensitivity of snCUT&RUN would better  
136 cater to the needs for applications that require higher-sensitivity histone profiling at single cell  
137 resolution.

138 A schematic of snCUT&RUN is shown in Figure 1A, and the detailed protocol is provided  
139 in the Materials and Methods section. The original CUT&RUN method has low background noise  
140 and requires a fraction of the sequencing depth compared to ChIP-seq. We found that several  
141 enhancements could transform this technique into a single cell method that could be performed in a  
142 standard molecular biology laboratory with access to a FACS facility (or other means of single cell  
143 isolation). First, we found that it was imperative to maintain nuclear integrity throughout the entire  
144 workflow to minimize background reads and ensure high quality data. Damage to nuclei results in  
145 release of ambient DNA, clumping of nuclei and loss of material. Hence, we formulated a lysis buffer  
146 with minimal detergent concentration; and the addition of sucrose plus BSA resulted in lysis with  
147 vastly reduced clumping when resuspending pellets during washing steps throughout the workflow.  
148 Lysis, antibody, and pA-MN binding steps were all performed in bulk, which reduced the amount of  
149 handling and the loss of individual cells after isolation. Second, directly after pA-MN incubation, the  
150 nuclei were stained in buffer containing a nuclear dye plus a labelled anti-nuclear pore complex  
151 antibody. This step greatly improved the efficiency in isolating single intact nuclei rather than  
152 multiple nuclei or debris. Third, low salt conditions have been shown to prevent pA-MN from  
153 diffusing after digestion, thereby reducing off-target cleavage of background DNA (Meers et al.  
154 2019). We adopted this approach by directly sorting single nuclei into a low-salt calcium buffer to  
155 initiate nuclease activity. Lastly, given that the library preparation stage is the major source of sample  
156 loss, inactivation of pA-MN, end-repair, A-tailing, indexed adapter ligation and SPRI steps were all  
157 performed with no tube transfers. The amount of paramagnetic SPRI beads used to remove unbound

158 adapters were doubled relative to PEG/NaCl to increase the surface area available for binding to the  
 159 DNA template. Furthermore, 50N neodymium magnets were used for separation to minimize dead  
 160 volumes. By avoiding proteinase K treatment, intact nuclei and high molecular weight debris could  
 161 be observed being retained by the SPRI beads after eluting the target DNA, thereby reducing  
 162 background. PCR was performed on pooled samples, the products concentrated via precipitation, and  
 163 adapter monomers and dimers removed with a second set of SPRI bead treatment. The template from  
 164 192 libraries were then sequenced on a single MiSeq chip (Methods).

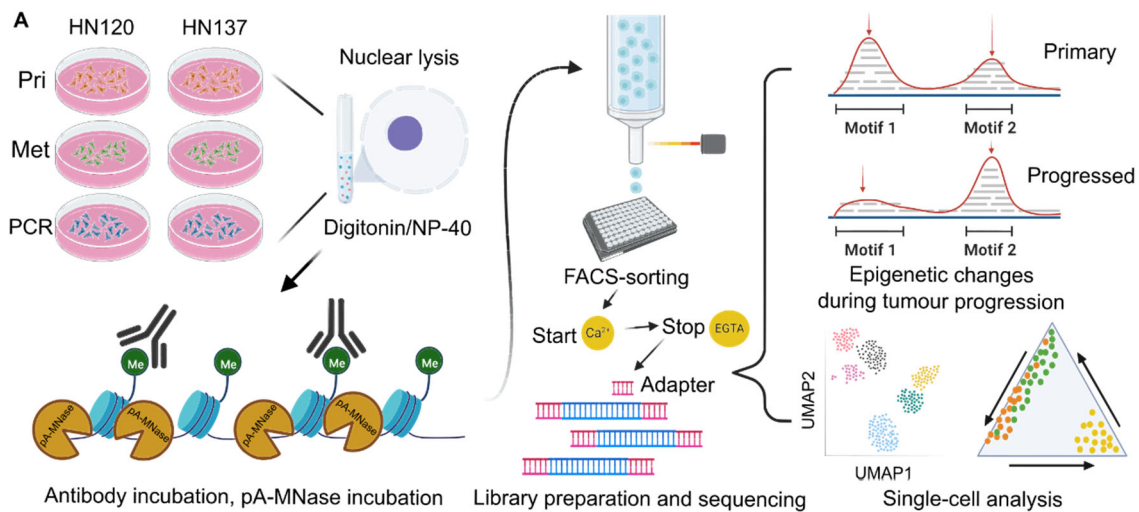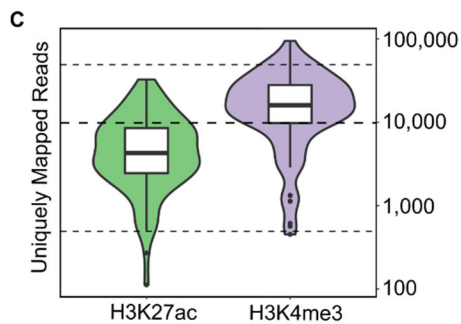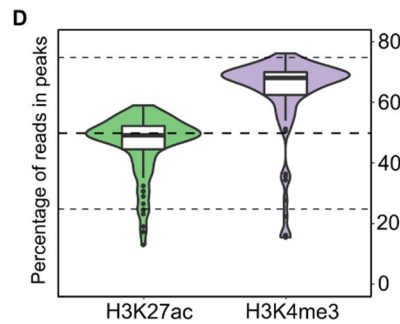

**Fig. 1. Schematic representation of overall workflow and quality control of snCUT&RUN.**

(A) Schematic overview of snCUT&RUN, applied on matched primary, metastatic, and primary cisplatin-resistant patient derived head and neck cancer cell lines from two patients (HN120 and HN137). (B) Representative IGV-track image showing H3K4me3 and H3K27ac single-cell profiles of 90 HN120Pri cells, with corresponding bulk cell data for each mark. (C) Violin- and boxplots showing the distribution of the number of unique mapped reads (UMRs) for each single-cell, for both H3K4me3 (median = 16,296) and H3K27ac (median = 4352). Dotted lines are at 50,000, 10,000 and 500 UMRs. (D) Violin- and boxplots illustrating the percentage of reads in peaks for each single cell. H3K4me3 median = 68%, H3K27ac median = 49%. Dotted lines are at 75, 50 and 25 percent.

165 We benchmarked the technical performance of snCUT&RUN on 90 sorted nuclei, probed  
166 either with anti-H3K4me3 or anti-H3K27ac antibodies. The sequencing read distribution of single  
167 cells exhibited a high degree of similarity with bulk cell populations probed with the respective  
168 histone-specific antibodies (Fig. 1B), demonstrating excellent specificity of our protocol. H3K4me3  
169 is a histone mark that is generally associated with active promoters. The read density profile from  
170 H3K4me3 snCUT&RUN samples showed similar profiles around transcriptional start sites (TSS) to  
171 that of the bulk cell set; with corresponding patterns of nucleosome depletion (Supplemental Fig.  
172 S1A), indicating the high resolution of this assay. Most strikingly, the median number of unique reads  
173 for the H3K4me3 was 16,296, whereas the corresponding number for H3K27ac was 4,352. As an  
174 indication of signal-to-noise, the median Fraction of Reads in Peaks (FRiP) were 68% for H3K4me3  
175 and 49% for H3K27ac (Fig. 1D), which to the best of our knowledge are on par with other single cell  
176 histone assays.

177 Comparison of the histone profiles of pooled snCUT&RUN with bulk CUT&RUN yielded  
178 a Pearson correlation 0.956 and 0.6089 for H3K4me3 and H3K27ac, respectively (Supplemental Fig.  
179 S1B and 1C). Collectively, these data indicated that snCUT&RUN recapitulated bulk CUT&RUN  
180 data to a high degree and that this method has the potential to resolve subtle epigenetic differences



181 that might be expected within cancer cell populations. Once over 1,000 cells had been screened for  
182 H3K4me3 and H3K27ac, we compared the performance of snCUT&RUN with previously published  
183 data on scCUT&Tag (Kaya-Okur et al. 2019) by ranking the cells by number of UMRs (Supplemental  
184 Fig. S1D). Although different antibodies were used in the two methods, we reasoned that there should  
185 be considerable overlap between the profiles of H3K4me2 and H3K4me3 modifications; being  
186 present at transcribing, and poised plus transcribing genes, respectively (Hyun et al. 2017). Under  
187 our experimental conditions, we could achieve almost an order of magnitude more uniquely mapped  
188 reads than scCUT&Tag. As a second metric we compared snCUT&RUN with previously reported  
189 single cell assay using CUT&RUN (ulicUT&RUN) by determining the percentage of reads which  
190 map uniquely (Supplemental Fig. S1E). Notably, snCUT&RUN produced better mapping rates after  
191 deduplication (12% for H3K27ac and 13% for H3K4me3) compared to 0.3-0.7% with ulicUT&RUN  
192 (Patty and Hainer 2021). This could be attributed to loss of material with ulicUT&RUN, where low  
193 template concentrations during PCR can cause an increase in artifacts (Ruiz-Villalba et al. 2017).

### 194 **Copy number amplifications may drive epigenetic reprogramming during metastatic** 195 **progression in HNSCC** 196

197 Having established the technical validity of snCUT&RUN, we utilized the R packages  
198 Signac and Seurat (Stuart et al. 2019, 2021) for an integrated analysis of snCUT&RUN data on  
199 previously established isogenic patient-derived HNSCC models that represent primary (Pri),  
200 metastatic (Met) and cisplatin-resistant primary tumor (PCR) cell lines from two individual patients  
201 (HN137 and HN120 (Chia et al. 2017; Sharma et al. 2018)) ([Supp. Table 1](#)). We used a set of filtering  
202 parameters (described in detail in Methods) to eliminate low quality cells. After filtering, single-cell  
203 profiles of 1,107 and 1,048 cells for H3K4me3 and H3K27ac-specific ChIP data respectively were  
204 used for downstream analysis. UMAP embedding of H3K4me3 and H3K27ac showed slightly  
205 different patterns and varying degrees of overlap between the cell types (Fig. 2A). From H3K4me3  
206 profiles, HN120Pri and HN120Met cells were indistinguishable, and a similar observation was made  
207 when comparing HN137Pri and HN137PCR cells (Fig. 2A, left).

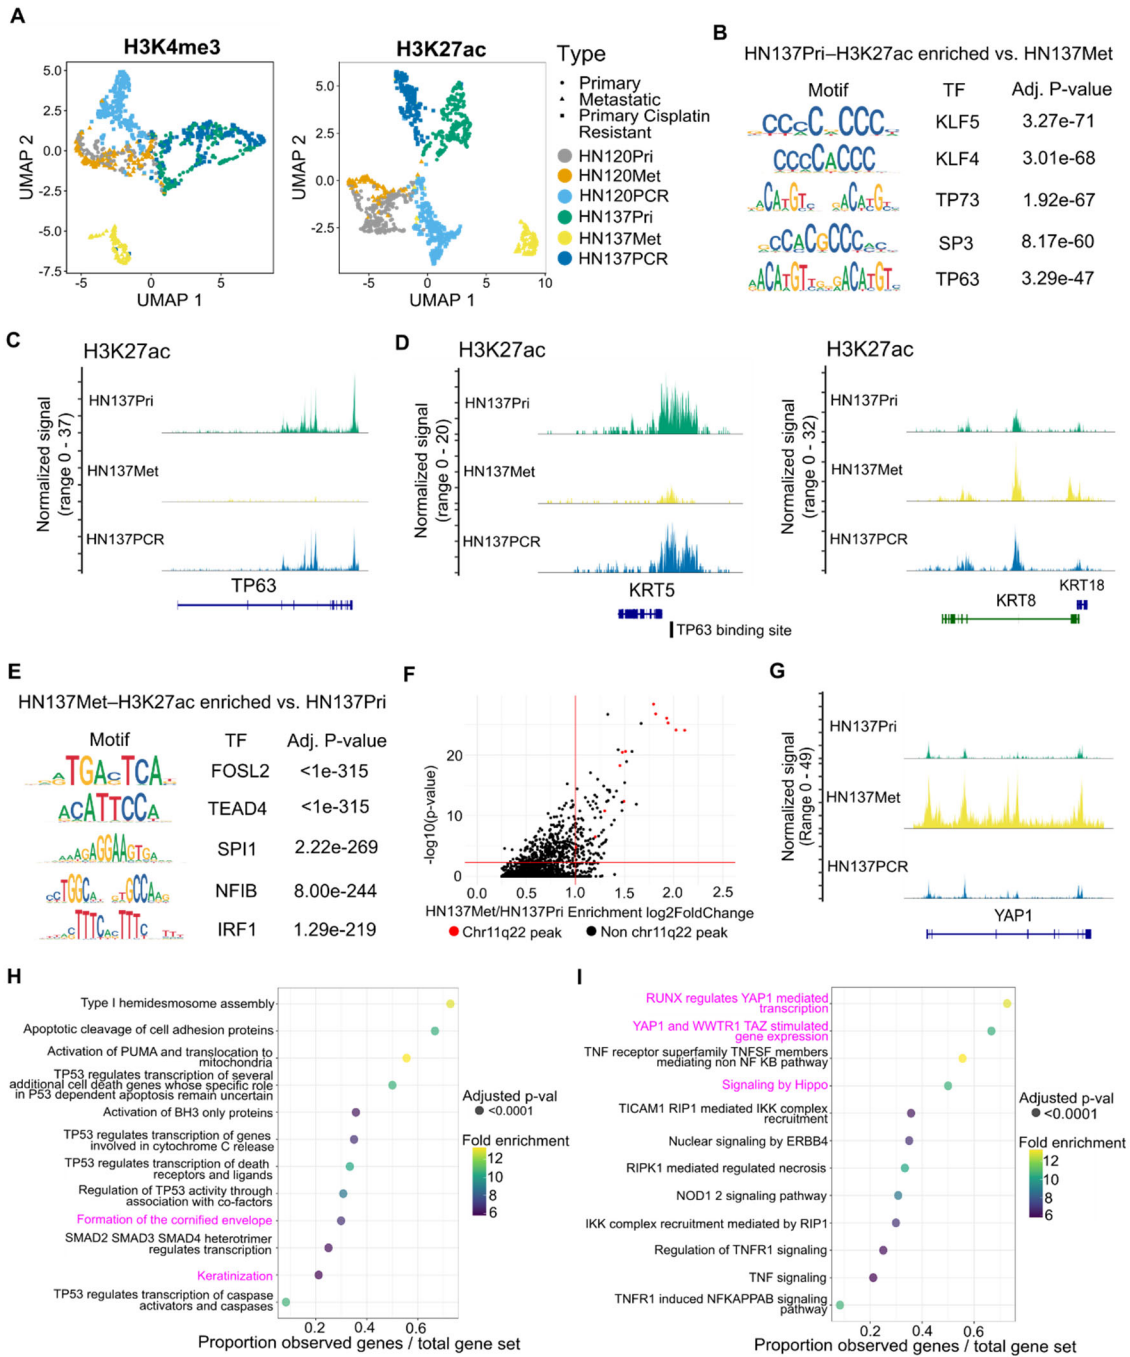

**Fig. 2. Epigenomic changes during HNSCC progression suggest distinct, patient-specific epigenetic drivers of tumour evolution. (A)** UMAP embedding for H3K4me3 (left) and H3K27ac (right) for HN120 and HN137 single-cells. **(B)** Enriched transcription factor motifs for HN137Pri derived from H3K27ac peaks. **(C)** Coverage plot of H3K27ac signal at the TP63 locus, showing loss of H3K27ac in HN137Met. **(D)** Coverage plots of H3K27ac signal at the KRT5 (left) and KRT8/18 (right) loci. TP63 binding site near the KRT5 promoter is indicated. **(E)** Enriched transcription factor motifs for HN137Met. **(F)** Top enriched H3K27ac peaks in HN137Met, with peaks at the chr11q22 locus containing YAP1 highlighted in red. **(G)** Coverage plot of H3K27ac signal at the YAP1 locus. **(H, I)** Dot plot indicating the Reactome pathways enriched in HN137Pri **(H)** and HN137Met **(I)**. Highlighted in magenta are terms indicating YAP1-mediated loss of differentiation in HN137Met.

208 In contrast, the PDCs were organized into more distinct clusters when H3K27ac profiles  
209 were used for clustering (Fig. 2A, right), suggesting that H3K27ac expression (active promoters and  
210 enhancers) is more divergent between primary and progressed cell states compared to promoter  
211 activity alone. Notably, HN120PCR and HN137Met seemed to have distinct profiles for both  
212 H3K4me3 and H3K27ac, indicating significant differences in their chromatin states when compared  
213 to other PDCs. We confirmed our clustering results by calculating Pearson-correlations between the  
214 H3K27ac/H3K4me3 profiles of the different cell types (Supplemental Fig. S2A,B). Furthermore, we  
215 did not detect significant batch effects in our clustering (Supplemental Fig. S2C,D).

216 Next, we sought to infer how changes in epigenetic landscape could drive HNSCC  
217 progression using the snCUT&RUN data. After Signac-integrated peak calling, we obtained a set of  
218 606,594 H3K27ac and 391,115 H3K4me3 peaks present in at least one cell line (Supplemental Fig.  
219 S3A,B). Out of these peaks, most are either cell-line specific or shared between all cell lines.  
220 However, snCUT&RUN was able to capture peaks that were shared by primary tumour and matched  
221 progressed cell lines (Supplemental Fig. S3C,D). Amongst the primary tumour/progressed paired cell  
222 lines with the starkest H3K27ac/H3K4me3 profile differences are HN137Pri and HN137Met (Fig.

223 2A). Transcription factor (TF) motif binding analysis in HN137Pri revealed an enrichment of TP63,  
224 a key lineage-determining regulator of epidermal keratinocyte identity (Qu et al. 2018), and KLF4,  
225 which was previously shown to regulate differentiation in the basal layer of the oral epithelia (Segre  
226 et al. 1999) (Fig. 2B). Upon plotting the H3K27ac coverage signal, we observed near loss of H3K27ac  
227 at the TP63 locus indicating downregulation of TP63, and thereby loss of lineage fidelity, in  
228 HN137Met (Fig. 2C). Since TP63 is known as a key regulator of basal keratinocyte identity, we also  
229 focused on the keratin (KRT) loci and found a near loss and gain of H3K27ac at the KRT5 and  
230 KRT8/18 loci, respectively, in HN137Met (Fig. 2D). KRT5/KRT18 immunofluorescence (IF)  
231 corroborated our findings from snCUT&RUN data (Supplemental Fig. S4A). Furthermore, we  
232 confirmed the downregulation of TP63 and KRT5 and upregulation of TEAD4 and KRT8/18 during  
233 HNSCC metastasis, with the analysis of two previously published scRNA-seq datasets from primary  
234 and metastatic HNSCC (Puram et al. 2017; Sharma et al. 2018) (Supplemental Fig. S4B-J). We found  
235 an annotated TP63 binding site near the KRT5 promoter, supporting the notion of KRT5 expression  
236 being driven by TP63. Additionally, H3K27ac profiles of the KRT5 and KRT8/18 loci in HN120  
237 PDCs corroborated the immunofluorescence-based protein expression (Supplemental Fig. S5A).  
238 Moreover, we observed concordant H3K4me3 activity at the KRT5/8/18 loci of HN120 and HN137  
239 PDCs (Supplemental Fig. S5B). Hence, the simultaneous presence (or absence) of H3K4me3 and  
240 H3K27ac is a strong indicator of epithelial cell identity. The findings of activating epigenetic marks  
241 in the KRT8/18 locus in HN137Met is significant, since high KRT8 expression has been associated  
242 with detachment of cells from tumours and seeding of lymph node metastasis in HNSCC (Matthias  
243 et al. 2008).

244 The TFs enriched in HN137Met include members of the TEAD family such as TEAD4, a  
245 downstream activator in the Hippo pathway, and FOSL2, a regulator in cellular differentiation (Fig.  
246 2E). Visualization of transcription factor activities at single cell level showed that loss of TP63 and  
247 TEAD4 in HN137Met and HN137Pri respectively (Supplemental Fig. S5C). Previously, it was  
248 shown that TEAD can repress TP63 promoter activity and protein expression (Valencia-Sama et al.  
249 2015). We further assessed the differential peaks between HN137Met and HN137Pri. Strikingly, the

250 top enriched peaks in HN137Met were predominantly located at the chr11q.22 locus containing  
251 YAP1 (Supplemental Fig. S3F). Increased activity of YAP1, in conjunction with its binding partner  
252 TEAD, was previously shown to promote proliferation and metastasis in multiple cancers, including  
253 HNSCC (Lamar et al. 2012; Chia et al. 2017; Omori et al. 2020). We also found a significant increase  
254 in H3K27ac activity of YAP1 (Fig. 3G). YAP1 is frequently amplified in HNSCC and indeed, we  
255 have previously reported YAP1 to be amplified in HN137Met, compared to the patient-matched  
256 HN137Pri (Chia et al. 2017; Shin and Kim 2020).

257 Finally, we assessed top differential enriched peaks ( $p < 0.005$ ) in HN137Pri and  
258 HN137Met and used the R package rGREAT (McLean et al. 2010; Gu 2022) to look for enriched  
259 biological pathways. Top enriched Reactome pathways in HN137Pri related to TP53 activity (a  
260 member of the same family as TP63) and keratinocyte differentiation, while top pathways in  
261 HN137Met include activation of the Hippo pathway, which includes YAP1 and TEAD, and TNF-  
262 mediated activation of NF $\kappa$ B (Fig. 2H,I). Altogether, these results suggest that H3K4me3/H3K27ac  
263 profiles derived from snCUT&RUN could be used to confirm phenotypical changes occurring  
264 between primary and progressed HNSCC. Furthermore, the results indicate that considerable changes  
265 in epigenetic modifications could be associated with copy number amplifications, and that a singular  
266 focal amplification, such as what was observed with YAP1, could lead to epigenetic reprogramming  
267 of HNSCC cells to acquire metastatic capabilities.

### 268 **Genetic-epigenetic alterations correlate with changes in gene expression**

269 Since our data suggested that genetic drivers such as YAP1 amplification could lead to  
270 changes in the epigenome, we further explored how changes in gene copy number and the  
271 combination of active histone marks, such as H3K4me3/H3K27ac, could correlate with alterations  
272 in gene expression. We first visualized H3K27ac signal of single cells at the YAP1 locus for  
273 HN137Pri and HN137Met and confirmed our previous findings from Signac in which we observed  
274 a marked increase in H3K27ac activity in the YAP1 signal in HN137Met (Fig. 3A). In contrast,  
275 regions without copy number differences do not exhibit significant differences in H3K27ac signal  
276

277  
278  
279  
280

(Fig. 3B). These observations reflect the copy number amplification at the YAP1 locus in HN137Met. Thus, snCUT&RUN can reveal not only the epigenetic changes, but also points towards regions potentially affected by copy number alterations. Several other loci with potential differences in copy number were also detected (Supplemental Fig. S6).

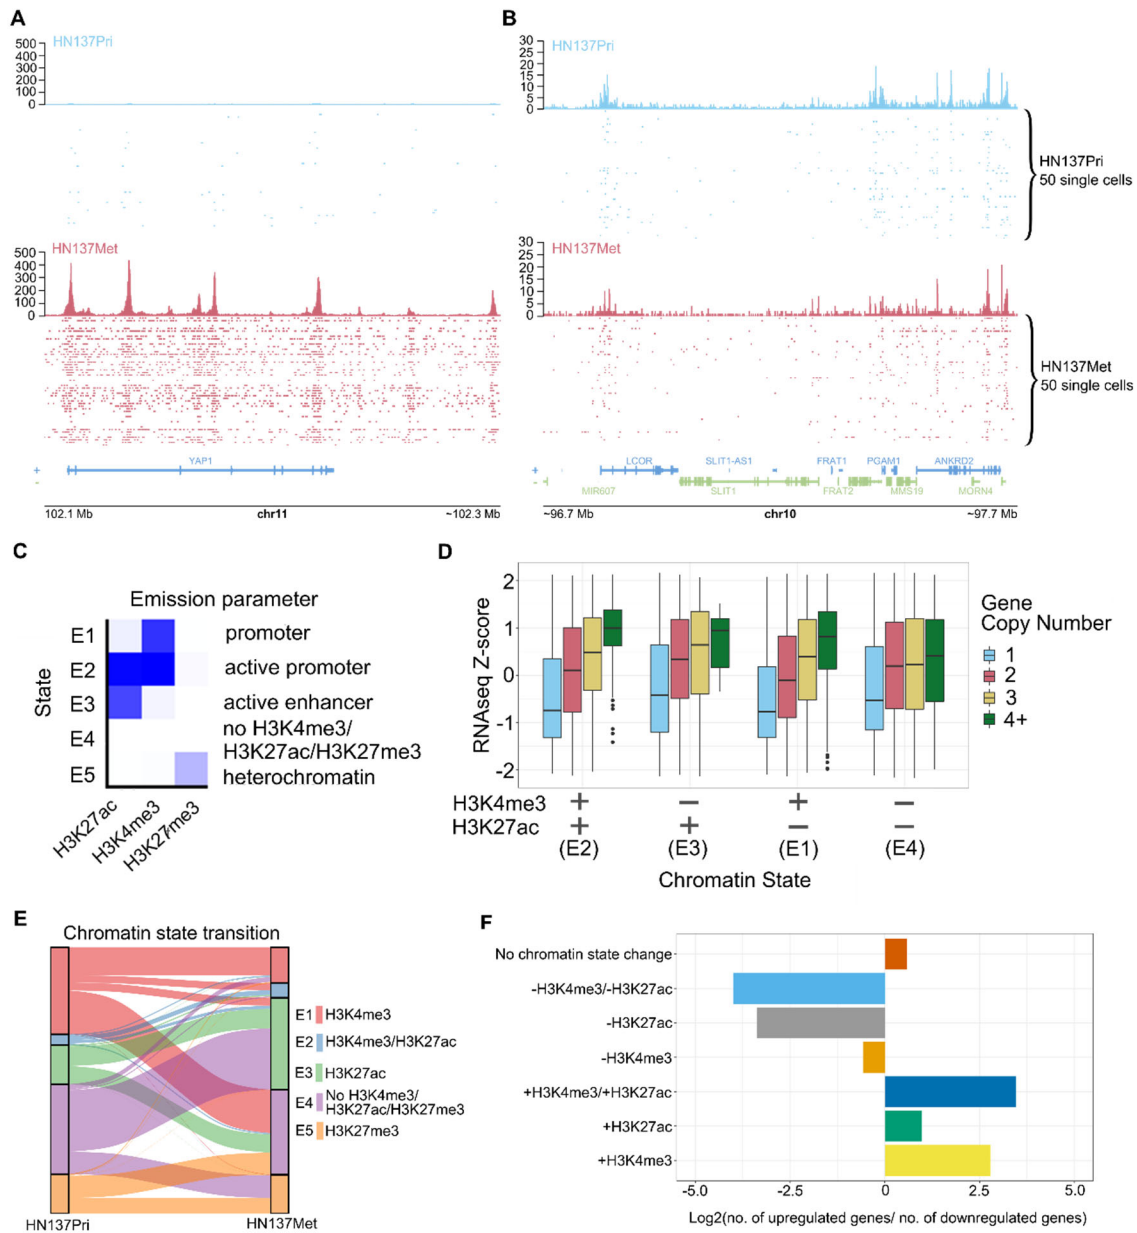

**Fig. 3. Regulation of gene expression through the interaction between copy number variations and chromatin state.** (A) Distribution of unique H3K27ac reads in single cells at the YAP1 locus in HN137Pri (blue) and HN137Met (red). Bulk H3K27ac signal and H3K27ac signal in single cells are shown. (B) Distribution of unique H3K27ac reads in a random, non-copy number different locus. (C) ChromHMM results identifying 5 chromatin states consisting of combinations of H3K4me3, H3K27ac, and H3K27me3 modifications in HN120 and HN137 PDCs. (D) Boxplots representing RNA-seq Z-scores of HN137Met genes, stratified by both gene CN as well as chromatin state annotation. (E) Alluvial plot showing chromatin state transition between HN137Pri and HN137Met. Unmodified chromatin (E4, purple) which remained unmodified during metastatic progression was excluded from the plot for visibility purposes. (F) Log<sub>2</sub> ratio of the number of upregulated (Log<sub>2</sub> FC > 1, p < 0.001) genes to the number of downregulated (Log<sub>2</sub> FC < -0.5, p < 0.001) genes per chromatin state change during metastatic progression of patient HN137 (HN137Pri > HN137Met).

281

282

283

284

285

286

287

288

289

290

291

292

293

294

Next, to correlate chromatin profiles with gene expression and copy number variations, we performed bulk RNAseq and whole exome sequencing (WES) on all PDCs. DNA copy number variation has been reported to correlate with gene expression changes. Indeed, we observed a clear positive correlation between PDC gene expression Z-score and the copy numbers for the same genes (Supplemental Fig. S7A). These results corroborate the notion that changes of gene expression in key cancer genes may arise from copy number variations (CNV). Nevertheless, we hypothesized that epigenetic modifications in such genetically altered loci may further modulate the expression of genes that reside within the same loci. This effect could be compensatory (epigenetic silencing of an amplified gene or epigenetic activation of a deleted gene) or conversely it could accentuate the effect of CNV (epigenetic activation of the amplified gene or silencing of the remaining copy of a deleted gene). To investigate these hypotheses, we first used ChromHMM (Ernst and Kellis 2012) to perform joint analysis based on pseudobulk H3K4me3, pseudobulk H3K27ac from snCUT&RUN as well as bulk H3K27me3 CUT&RUN data. ChromHMM results revealed five chromatin states, reflecting

295 distinct chromatin state annotations: weak promoter (E1, H3K4me3 only), active promoter (E2,  
296 H3K4me3+/H3K27ac+), active enhancer (E3, H3K27ac only), heterochromatin (E5, H3K27me3  
297 only) and unmodified regions with none of the probed chromatin marks present (E4) (Fig. 3C). We  
298 then combined gene copy number (CN), chromatin state annotation, and gene expression data to  
299 investigate how chromatin state and gene CN may synergistically influence gene expression. The  
300 results showed that in the presence of activating epigenetic marks, gene expression Z-scores increase  
301 with copy number, and gene expression levels are higher (Fig. 3D, Supplemental Fig. S7B). Genes  
302 that have simultaneous H3K4me3 and H3K27ac marks meanwhile have higher gene expression Z-  
303 scores compared to singly-marked genes. Meanwhile, genes that do not have an activating epigenetic  
304 mark surprisingly show little to no correlation with gene expression Z-score despite their CN status.  
305 Our results therefore underscore the importance of epigenetic modifications to modulate the effects  
306 of CNVs on gene expression during HNSCC progression. Without the appropriate epigenetic  
307 modifications, the effects of CNV are masked and would not manifest in gene expression. These  
308 results further highlight the need to consider both CNVs as well as epigenetic modifications on gene  
309 regulatory elements to understand factors influencing the progression of HNSCC more  
310 comprehensively and accurately.

311 Next, we decided to interrogate how epigenetic profiles at single cell resolution could assess  
312 the function of chromatin state dynamics in driving HNSCC progression from primary cancers to a  
313 progressed state (metastatic or treatment resistant). We therefore analyzed genome-wide chromatin  
314 state transitions between paired, patient-matched primary and progressed PDCs (HN120Pri to  
315 HN120Met, HN120Pri to HN120PCR (drug resistant), HN137Pri to HN137Met, and HN137Pri to  
316 HN137PCR). We found that most of the epigenome (~95%) remained devoid of H3K27ac, H3K4me3  
317 and H3K27me3 (E4). Furthermore, we observed diversity in histone mark changes across the various  
318 transitions (Fig. 3E, Supplemental Fig. S8A). The general trend, however, was that comparing  
319 primary tumour PDCs with their matched progressed PDCs, there appeared to be a greater proportion  
320 of genomic regions that acquire the active H3K27ac mark in the progressed state. Meanwhile, the  
321 proportion of H3K4me3-marked regions either decreased or remained unchanged. Previous reports



322 have suggested that alterations in cellular metabolism during cancer progression can modulate the  
323 levels of co-factors that are substrates of chromatin-modifying enzymes (e.g., acetyl-CoA for histone  
324 acetyltransferase) consistent with our observation of increased H3K27ac marks in progressed state.  
325 Metabolic reprogramming in cancer cells have been shown to promote EMT by epigenetic activation  
326 of EMT-associated genes (Wang et al. 2020). Indeed we found increased H3K27ac signal at the  
327 SERPINE1 and SERPINA1 genes, which were previously associated with metastasis, apoptosis  
328 resistance, and poorer prognosis in HNSCC (Supplemental Fig. S8B) (Pavón et al. 2015), supporting  
329 the epigenetic basis of metastasis in HNSCC.

330 Finally, we investigated whether significant changes in gene expression during HNSCC  
331 progression correlated with changes in chromatin state. We filtered the top downregulated (log<sub>2</sub> fold  
332 change < -0.5, p < 0.001) and upregulated genes (log<sub>2</sub> fold change > 1, p < 0.001) during the  
333 HN137Pri > HN137Met transition and calculated the enrichment of gene expression change per  
334 chromatin state transition. We found that downregulation of gene expression was indeed associated  
335 with the loss of H3K4me<sub>3</sub>/H3K27ac active marks, whereas genes displaying upregulated expression  
336 were associated with a gain of either or both H3K4me<sub>3</sub>/H3K27ac marks (Fig. 3F). Altogether, the  
337 data suggests that during HNSCC progression, the gain of H3K27ac in key enhancers as a  
338 consequence of a global increase in acetylation may serve as the primary drivers of changes in gene  
339 expression that promote cell-state transitions. Furthermore, our data also suggests that alterations in  
340 chromatin states occurring between primary and progressed HNSCC are dynamic and heterogeneous,  
341 reflecting the diversity of epigenetic changes during tumour progression. These results further  
342 corroborated our previous findings that global changes in the epigenome could lead to change in gene  
343 expression, highlighting the need for considering chromatin state changes when exploring  
344 mechanisms of HNSCC progression. Finally, these results collectively suggest that changes in gene  
345 CN and chromatin states may be interconnected in HNSCC, and that multimodal integration of  
346 genomic and epigenomic data would be essential to generate a more comprehensive understanding  
347 of HNSCC progression.

## Epigenome profiling at single nuclear resolution identifies subpopulations of primary HNSCC tumour cells with higher propensity for metastatic progression

Our results above reveal that both genetic changes, exemplified by CNV, and epigenetic flux work in tandem to rewire the gene expression network that drives cancer progression. Amplifications on key oncogenes (e.g., YAP1) that associate with crucial transcription factors could have a disproportionate effect on changing the global epigenetic landscape through interactions with histone writers. We speculate that such structural alterations could account for why the epigenetic profiles of HN137Met or HN120PCR were found to be far removed from their primary counterparts. On the other hand, the transitions between HN137Pri → HN137PCR and HN120Pri → HN120Met did not reveal clear genetic drivers of progression identified through whole exome sequencing analysis. In the context of HNSCC progression, some cell subpopulations, especially those at the invasive borders of primary tumors, have been shown to express a partial epithelial-to-mesenchymal (pEMT) transcription program (Puram et al. 2017). Compared to irreversible genetic changes, non-genetic changes could be much more plastic and heterogeneous among cancer cells. Microenvironmental pressures may lead to primary tumour cancer cells to adapt by acquiring a range of epigenetic states and this cellular plasticity could confer survival and growth advantage under the selective pressure of metastasis or drug treatment. We therefore sought to utilize the snCUT&RUN data to explore ITeH as a factor driving HNSCC progression in absence of a clear genetic driver. We first analyzed the transition between HN137Pri and HN137Met, since these PDCs were found to have higher similarity in H3K4me3/H3K27ac profiles as well as phenotype (Fig. Supplemental Fig. S2A, Supplemental Fig. S4A).

Analyzing H3K27ac profiles, we found a lower number of differentially enriched peaks (p-value < 0.005) in HN137PCR versus HN137Pri (2,245), compared to HN137Met versus HN137Pri (4,797). Hence, changes in H3K27ac expression during the cisplatin resistance of HN137Pri appeared to be less widespread compared to the metastatic progression of patient HN137. These results point to a gradual change in the epigenome caused by ITeH, rather than a genetically driven change during progression to a drug-resistant state. To further investigate ITeH in the cisplatin resistance

375 progression of HN137Pri, we defined PDC-specific “modules”, which are features consisting of the  
376 top fifty differential peaks defining a specific PDC-state. This analysis was inspired by scRNA-seq  
377 analysis, where modules are defined as groups of genes that are part of the same module/program -  
378 typically referring to cell-type specific gene expression signatures. After defining H3K27ac modules  
379 for each PDC, we then computed ChromVAR deviation Z-scores of each module for each individual  
380 cell. In our case, the Z-score represents how far the H3K27ac profile of that cell deviates from the  
381 average H3K27ac profile of every cell within the peaks as defined by the PDC-specific modules.  
382 Analyzing the ChromVAR deviation Z-scores of the HN137 isogenic cell lines, we found  
383 unsurprisingly that each PDC has the highest module score of their individual module (e.g.,  
384 HN137Met has highest Z-score for the HN137Met module) (Fig. 4A). The deviation Z-score profiles  
385 confirmed that each module is capable of distinguishing identities of individual PDCs. However, we  
386 also observed a degree of variability in Z-scores within a given cell type, prompting the question  
387 whether this represents the possibility of epigenetically heterogeneous state within the PDCs. We  
388 therefore normalized the primary tumour, metastatic, and primary tumour cisplatin resistant module  
389 scores of each single cell and plotted the normalized scores using ternary plots, making use of the  
390 three-variable nature of our data to visualize the ratio of Pri/Met/PCR module score per single cell  
391 (Fig. 4B). Ternary plot visualization confirmed our previous findings, showing that HN137Pri and  
392 HN137PCR cells are in a continual axis based on their module scores. Such continuity was not  
393 observed between HN137Pri and HN137Met, suggesting that the HN137Pri → HN137PCR  
394 transition is characterized by intrinsic epigenetic intratumoural heterogeneity and not defined by  
395 strong genetic/epigenetic drivers, as is the case with HN137Pri → HN137Met progression (Fig. 4B).

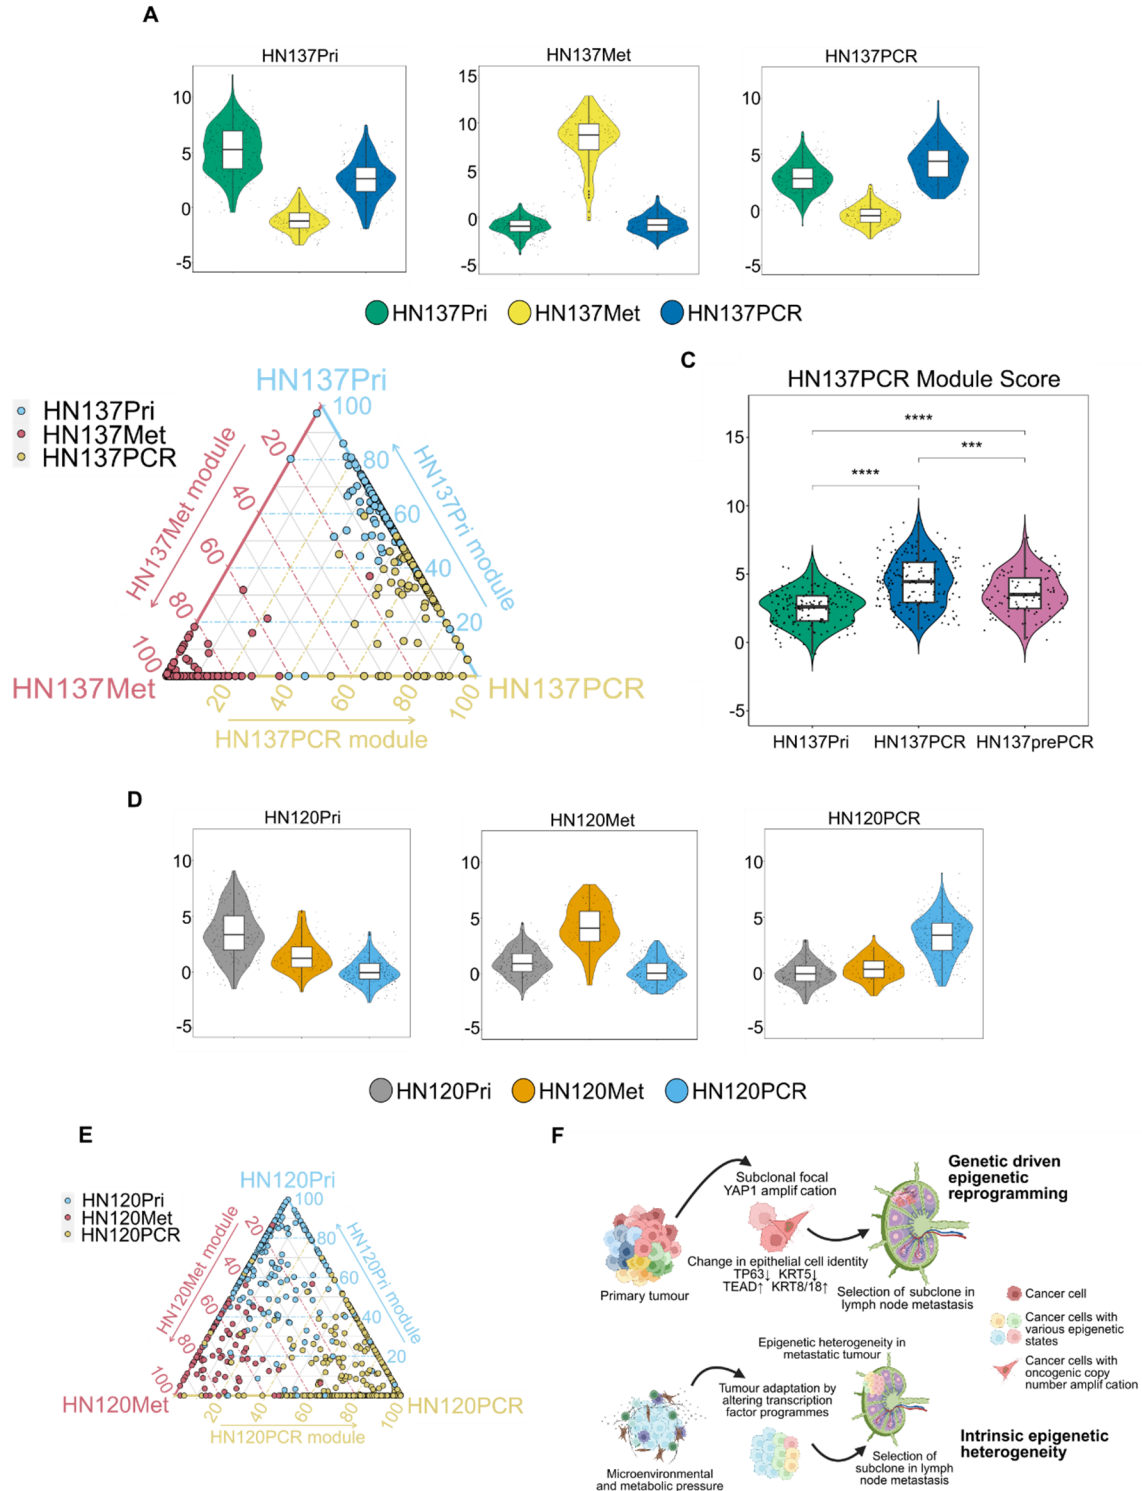

**Fig. 4. Epigenetic heterogeneity-driven HNSCC progression.** (A) PDC-specific HN137 H3K27ac module score. Each module consists of the top 50 peaks for a particular PDC, and each module score was back calculated for each single-cell using Signac's AddChromatinModule function. (B) Ternary plot showing the ratios of Pri/Met/PCR module scores for patient HN137 (C) Violin plot depicting the recalculated HN137PCR module score after identification of the HN137prePCR subpopulation (\*\*\*) p-value  $\leq 0.001$ , \*\*\*\* p-value  $\leq 0.0001$ ). (D) PDC-specific HN120 H3K27ac module score. (E) Ternary plot showing the ratios of Pri/Met/PCR module scores for patient HN120. (F) Model of diverse ways in which epigenetic changes can lead to adaptation of cellular phenotype to acquire a more aggressive state.

402

403 To further investigate epigenetic heterogeneity, we set apart HN137Pri cells with  
404 Pri/Met/PCR module score ratio of  $>0.4$  Pri and  $>0.4$  PCR and annotated these cells "HN137prePCR"  
405 cells. We obtained 93 HN137Pri cells (representing 37% of the primary population) fulfilling this  
406 criterion. HN137prePCR cells were found to have a higher average score of the HN137PCR module  
407 compared to the remaining HN137Pri cells, yet still below the average of HN137PCR cells (Fig. 4C).  
408 This could potentially indicate that HN137prePCR cells represent a primary tumour cell  
409 subpopulation which is predisposed towards becoming cisplatin resistant because of their "cisplatin  
410 resistant-primed" epigenetic state. To exclude UMR count and FRiP as confounding factors of the  
411 module scores, we compared the UMR count and FRiP of HN137prePCR cells against the remaining  
412 HN137Pri cells, as well as HN137PCR cells. HN137prePCR cells did not have higher UMR count  
413 on average as compared to the remaining HN137Pri as well as HN137PCR cells (Supplemental Fig.  
414 S9A). Furthermore, HN137prePCR cells did not have higher FRiP values as compared to HN137PCR  
415 and HN137Pri cells (Supplemental Fig. S9B). Hence, UMR count and FRiP were not deemed to be  
416 significant factors in determining module scores.

417 Finally, we investigated whether ITeH could drive the lymph node metastatic progression  
418 of patient HN120 (Fig. 4D). In a similar approach to investigate whether ITeH drives the progression  
419 of cisplatin resistance in patient HN137, we isolated HN120Pri cells with  $>0.4$  HN120Pri H3K27ac

420 module ratio and  $>0.4$  HN120Met module ratio. We observed 26 cells that met this criterion (~9% of  
421 the total HN120Pri population) and relabeled these HN120Pri cells as the “HN120preMET”  
422 subpopulation (Fig. 4D, E). Similar to HN137prePCR, recalculation of the HN120Met module score  
423 showed that the HN120preMET cells have higher average deviation Z-score for the HN120Met  
424 module as compared to the remaining HN120Pri cells, but still lower than HN120Met cells  
425 (Supplementary Fig. 9C). Overall, the HN120preMET and HN137prePCR analyses support the  
426 existence of H3K27ac landscape heterogeneity in HNSCC tumours and suggests that in the absence  
427 of strong genetic drivers, tumour adaptation could drive ITeH in primary HNSCC tumours, leading  
428 to certain selected, epigenetically primed, subpopulations acquiring a phenotype with higher  
429 propensity to progress into a more malignant state.

## 431 Discussion

432 Intratumour heterogeneity of chromatin states can serve as an epigenetic driver of HNSCC  
433 progression. However, studies using single-cell methods to profile epigenetic heterogeneity in  
434 HNSCC models of cancer progression remain lacking. Here we developed snCUT&RUN, a robust  
435 method to profile histone modifications at the single-cell level. We showed that snCUT&RUN could  
436 provide insights in chromatin state transitions between isogenic primary and progressed HNSCC  
437 PDCs at the level of both global and single-cell resolution. At the global level, we found that generally  
438 H3K27ac signal is better capable of distinguishing different PDC cell-states, suggesting that active  
439 enhancer and promoter landscapes are more unique to each individual cell state when compared to  
440 just promoter activity alone. Furthermore, our results indicate that gain of H3K27ac at promoters  
441 and/or poised enhancers may serve as critical factors driving tumour progression. We validated that  
442 H3K27ac/H3K4me3 activity at the KRT5 and KRT8/18 loci served as an accurate indicator of  
443 epithelial identity, and that snCUT&RUN can be used to comprehensively analyze a mixture of  
444 samples to infer epithelial changes and the accompanying TF motif changes during tumour  
445 progression. Importantly, we showed that these changes are possibly associated with a focal copy  
446 number amplification of YAP1, which in turn could lead to altered TEAD activity and subsequent

447 epigenetic rewiring. Indeed, an increasing body of evidence show that genetic and epigenetic factors  
448 are closely associated with driving tumour heterogeneity and progression. An example of this  
449 interplay between the genome and the epigenome was highlighted in recent studies on  
450 extrachromosomal circular DNA (ecDNA) amplifications that not only amplify oncogenes, but also  
451 functional elements such as enhancers, thereby increasing chromatin accessibility and downstream  
452 expression of key oncogenes (Wu et al. 2019; Morton et al. 2019). We further showed that gene  
453 expression is affected by both gene copy number as well as gene chromatin state, where the highest  
454 gene expression was observed in genes that have higher copy number *and* have active chromatin  
455 marks. These results emphasize the complexities of factors that promote tumour progression and  
456 highlight the importance of considering both genetic and epigenetic factors that drive cell-state  
457 plasticity.

458 However, we noted that some epigenetic changes were more subtle and did not involve  
459 wide-scale epigenetic rewiring driven by alterations in the genome. Comparing both HN120Pri and  
460 HN120Met as well as HN137Pri and HN137PCR, we did not observe clear lineage infidelity from  
461 both H3K4me3 and H3K27ac profiles. This led to the hypothesis that in some tumours,  
462 microenvironmental pressures such as metabolic dysregulation or challenges from the immune  
463 system may lead to primary tumour subpopulations to activate certain transcription factor  
464 programmes to adapt to these selective pressures. This adaptation process inherently leads to  
465 heterogeneous chromatin states in the primary tumour, which may confer selective fitness to the  
466 subpopulations with an intermediate malignant chromatin state. Indeed, a previous study described a  
467 subpopulation of malignant HNSCC cells being in a state of pseudo-epithelial to mesenchymal  
468 transition (pseudo-EMT), which correlated with cancer progression (Puram et al. 2017). We used the  
469 module score analysis and showed that H3K27ac profiles could be used to find such subpopulations  
470 that may have a higher propensity to progress to malignant cell states.

471 We note that the samples we have used for this study are long-term cell cultures which may  
472 have acquired a degree of homogeneity through the course of several passages. However, some  
473 evidence suggests that heterogeneity is maintained even in long-term cultured cell lines. For example,

474 our cell line models exhibit chromosomal instability (CIN). CIN is known to lead to heterogeneity in  
475 gene expression, while at the same time being maintained in long term cell cultures. In a study by  
476 Minussi et al. (Minussi et al. 2021), the authors performed single-cell clonal outgrowth of the CIN-  
477 affected MDA-MB-231 breast cancer cell line and found that karyotype diversity was regained after  
478 only 19 passages, suggesting that *in vitro* cancer cell cultures re-diversify their genomes and maintain  
479 genetic heterogeneity throughout passaging. Epigenomic heterogeneity was also shown to be  
480 maintained in cell lines. Litzenburger et al. observed through scATAC-seq experiments that the  
481 leukemic cell line K562 exhibited epigenomic heterogeneity which has functional consequences such  
482 as drug response (Litzenburger et al. 2017). Hence, it is likely that our cell line models exhibit  
483 sufficient intratumour heterogeneity to make single-cell assessments useful.

484 Altogether, based on the observations from snCUT&RUN analysis on isogenic primary and  
485 progressed cell states in HNSCC, we propose the following working model for epigenetic control of  
486 HNSCC progression (Fig. 4F). First, in the presence of a strong genetic driver, e.g., a copy number  
487 amplification, epigenetic reprogramming can occur, which may result in the selection of cells with  
488 favorable gene expression signatures to progress. Second, in the absence of strong genetic drivers,  
489 microenvironmental pressures may drive a primary tumour adaptation response, leading to  
490 intratumour epigenetic heterogeneity. ITeH results in the emergence of transitional subpopulations  
491 that are more prone to progress into a more malignant or resistant cell-state. Future characterization  
492 of such sub-populations can result in the identification of prognostic biomarkers and therapeutic  
493 targets that can be used for better patient stratification and the development of novel intervention  
494 strategies to block progression to malignant states.

495 At present, snCUT&RUN is positioned as a medium-throughput assay. Slightly more than  
496 2000 FACS sorted single cells were profiled in this work. Although it may not achieve the throughput  
497 of scCUT&TAG assays, its high sensitivity is a major advantage for uncovering subtle cell-to-cell  
498 epigenetic heterogeneity, such as those found within a tumour. We envisage that future improvements  
499 such as automation of single cell library preparation with an automated liquid handler would further  
500 enable snCUT&RUN assay to be adopted by the wider scientific community.



501  
502  
503  
504  
505  
506  
507  
508  
509  
510  
511  
512  
513  
514  
515  
516  
517  
518  
519  
520  
521  
522  
523  
524  
525  
526  
527

## Methods

### Cell materials and tissue culture

HN120Pri, HN120Met, HN137Pri and HN137Met patient derived cells (PDCs) used for this study were retrieved from a biobank previously generated using described methods (Chia et al. 2017). Likewise, HN120PCR and HN137PCR cells were generated as part of an earlier study (Sharma et al. 2018). [The identities of the primary cell lines and their derivative were confirmed using short-tandem repeat \(STR\) profiling \(Supp. Table 1\).](#) Normal tissue samples for these patients were not available for experiments. Cells were cultured with RPMI medium supplied by 10% Fetal Bovine Serum (FBS) and 1% penicillin/streptomycin. Medium was replaced every 2-3 days. Cells were cultured in 37°C and 5% CO<sub>2</sub> and passaged when cultures reached ~90% confluency. Cells were tested for mycoplasma and were only used for experiments after being confirmed to be mycoplasma negative.

### Immunofluorescence

Cells were cultured in 96-well plates with 10,000 – 20,000 seeding density for 48 hours. Fixation was done in acetomethanol 1:1 ratio for 10 minutes at -20°C degrees. After washing 3X with 1X PBS, blocking was done with 2% BSA/0.1% Triton X-100/PBS for 1hr+. The following primary antibodies were used: ab17130 (KRT5, 1:100 dilution) and ab32118 (KRT18, 1:100 dilution), and cells were incubated at 4°C overnight. Alexa Fluor488/594 and Hoechst33342 were used during secondary antibody incubation for 30 minutes at 37°C. Cells were imaged with the Nikon EclipseTi inverted microscope using widefield setting and 20X magnification.

### Single nuclei CUT&RUN

Cells cultured to ~80% confluence in T75 flasks were harvested and washed 2X in Sucrose Buffer (5% sucrose, 1% BSA, 20mM HEPES pH7.5, 150mM sodium chloride 0.5mM spermidine, 1X cOmplete™, Mini, EDTA-free Protease Inhibitor Cocktail (Roche, Cat# 04693159001) at 200 x

528 g for 3 min. For each antibody tested,  $1.5 \times 10^6$  cells were dispensed into Protein LoBind® Tubes  
529 (Eppendorf, Cat# 0030108442), pelleted and suspended in 1X ice cold lysis buffer (Sucrose Buffer  
530 containing 0.005% NP-40, 0.005% digitonin, 2mM EDTA and 10mM sodium butyrate). The amount  
531 of cell lysis was detected using the trypan blue exclusion assay, and remaining intact cells were lysed  
532 by titrating-in 2X cold lysis buffer (Sucrose Buffer containing 0.01% NP-40, 0.01% digitonin, 2mM  
533 EDTA and 10mM sodium butyrate). Nuclei were pelleted then suspended in Sucrose Buffer  
534 containing 1:100 anti-Histone H3 (tri methyl K4) antibody (abcam, Cat# ab213224) or anti-acetyl-  
535 Histone H3 (Lys27) (Merck, Cat# MABE647) and incubated  $\geq 1.5$ h at 4°C with intermittent agitation.  
536 Nuclei were washed 2X with Sucrose Buffer then suspended in 700 ng/ml pA-MN (a kind gift from  
537 Steven Henikoff) in Sucrose Buffer and incubated for 60 min at 4°C. Pelleted nuclei were suspended  
538 in Nuclear Stain Buffer (Sucrose Buffer containing 1:4,000 Alexa Fluor® 647 anti-Nuclear Pore  
539 Complex Proteins Antibody (BioLegend, Cat# 682204) plus 4 $\mu$ M ethidium homodimer (Invitrogen,  
540 Cat# E1169) and incubated at room temperature (RT) for 10 min. After 2X washes with Sucrose  
541 Buffer the nuclei were suspended in Low Salt Buffer (20 mM HEPES pH 7.5, 0.5 mM spermidine).  
542 FACS was performed with an MoFlo Astrios Cell Sorter (Beckman Coulter) operated using Summit  
543 software. Single nuclei were gated first using forward and side scatter pulse area parameters (FSC-A  
544 and SSC-A), aggregates excluded using pulse width (FSC-W and SSC-W), then isolated nuclei were  
545 gated based on AF647 and ethidium homodimer fluorescence. Nuclei were sorted directly into 3  $\mu$ l  
546 of calcium buffer (10 mM calcium chloride, 3.5 mM HEPES pH 7.5) in PCR strip tubes for DNA  
547 digestion. As a quality control measure, nuclei were also sorted into buffer on flat-well optical plates  
548 (4titude, Cat# 4ti-0970/RA) to check for wells with more than one isolated nuclei via fluorescence  
549 microscopy. For each array of 96 PCR tubes, positive and negative control tubes were included which  
550 comprised of 1,000 dispensed nuclei or buffer-only wells, respectively. To stop digestion, 1  $\mu$ l of 4X  
551 STOP Buffer (600 mM sodium chloride, 80 mM EGTA and 0.05% digitonin) was added to the sides  
552 of the strip tubes, the tubes pulse centrifuged, mixed by touching the sides of the tubes against a  
553 rotating vortex, then pulse centrifuged a second time. Tubes were then incubated at 37°C for 30 min.

554 Library prep on single nuclei was performed as follows: 0.8  $\mu$ l 1X End Repair and A-  
555 Tailing Buffer/Enzyme Mix (KAPA Hyper Prep Kit, Cat# 07962363001) was added to the sides of  
556 the tubes, mixed as before, then incubating at 12°C for 15 min, 37°C for 15 min, 58°C for 90 min,  
557 then 8°C on hold. Adapter ligation was performed by adding 0.5  $\mu$ l 300 nM Unique Dual Indexed  
558 adapter (NEXTFLEX, Cat# NOVA-514150 or NOVA-514151) and 3.6  $\mu$ l 1X Ligation  
559 Buffer/Enzyme mix (KAPA Hyper Prep Kit, Cat# 07962363001) to the sides of the tubes, mixed as  
560 before, then incubating for 16 hours at 4°C.

561 To remove excess adapters, the volumes were adjusted to 20  $\mu$ l with 10 mM Tris pH 8.0,  
562 20  $\mu$ l 2X SPRI beads (MagBio Genomics, Cat# AC-60050) [2X SPRI beads: 1 volume SPRI beads  
563 magnetically separated, ½ volume PEG/NaCl solution removed (and stored), then beads re-  
564 suspended. This increases the surface area of beads for DNA to adsorb to.] added to inverted fresh  
565 strip tube caps, the caps were then affixed, the tubes mixed as before then incubated at RT for 2 hours.  
566 SPRI beads were separated by tethering the strip tubes to N50 grade neodymium magnets affixed to  
567 a ferrous metal rig for stability. The supernatant was removed, the beads washed twice with 80%  
568 ethanol then allowed to dry for 3 min at RT. The tubes were removed from the magnets and beads  
569 suspended in 20  $\mu$ l 10 mM Tris pH 8.0. 22  $\mu$ l PEG/NaCl was added and mixed into the beads with  
570 pipetting, then incubated for 2 hours at RT (or tubes left overnight at 4°C, brought back to RT, then  
571 incubated for 2 hours at RT). Beads were washed twice with 80% ethanol, air dried for 3 min then  
572 suspended in 7.5  $\mu$ l 10 mM Tris pH 8.0 and DNA allowed to elute for  $\geq$  10 min at RT. Hereafter the  
573 positive control tubes were treated separately and not pooled with single nuclei libraries and no  
574 template controls. The beads were magnetically separated as above and pooled eluate added to PCR  
575 strip tubes containing 2X KAPA HiFi HotStart ReadyMix (Roche, Cat# 07958935001) and 2 mM  
576 each of P5 (AATGATACGGCGACCACCGAGATCTACA\*C) and P7  
577 (CAAGCAGAAGACGGCATAACGAGA\*T) primers with phosphorothioate bond as indicated with  
578 asterisk. PCR was performed with a thermocycler using a heated lid under the following cycling  
579 conditions: 98°C for 45s; 19 cycles of 98°C for 15 s, 60°C for 10 s; 72°C 1 min, 8°C on hold.

580 Pooled library DNA was concentrated as follows: amplified DNA was pooled together, 400  
581  $\mu$ l aliquots dispensed into 1.5 ml tubes, 400  $\mu$ l Phenol:Chloroform:Isoamyl Alcohol 25:24:1 added  
582 and the samples vortexed. The mixture was then transferred to MaXtract High Density tubes  
583 (QIAGEN, Cat# 129056) and centrifuged at RT for 5 min at 16,000 x g. 400  $\mu$ l chloroform was then  
584 added to the MaXtract tubes, mixed by inverting several times, then centrifuged at RT for 5 min at  
585 16,000 x g. The aqueous phase from each MaXtract tube ( $\sim$ 400  $\mu$ l) was then transferred to 1.5 ml  
586 tubes containing 2  $\mu$ l of 2  $\mu$ g/ $\mu$ l glycogen (Roche, Cat# 10901393001), 1 ml ethanol was added, the  
587 tubes vortexed, then incubated at -20°C overnight. DNA was pelleted by centrifuging at 20,000 x g,  
588 10 min at 4°C, washed with 1 ml 100% ethanol, then air dried for at least 15 min at room temperature.  
589 Pellets were suspended and combined in a total volume of 100 $\mu$ l 10 mM Tris pH 8.0. Adapter dimers  
590 and excess primers were removed by adding 90  $\mu$ l SPRI beads and incubating for 15 min at RT,  
591 magnetically separating the beads, washing twice with 80% ethanol and eluting with 50 $\mu$ l 10 mM  
592 Tris pH 8.0. DNA was allowed to rebind to the beads by adding 45  $\mu$ l PEG/NaCl, the beads were  
593 incubated for 15min at RT, magnetically separated, washed twice with 80% ethanol, then eluted in  
594 50  $\mu$ l 10 mM Tris pH 8.0. A third SPRI bead purification with a ratio of 1:1 was found to be necessary  
595 to remove residual adapter dimers prior to sequencing (i.e. 50  $\mu$ l PEG/NaCl added to the DNA/bead  
596 mixture, and two ethanol washes performed). Finally, the DNA was eluted in 20  $\mu$ l 10 mM Tris pH  
597 8.0. All libraries were sequenced using paired-end sequencing on an Illumina MiSeq™, with samples  
598 processed using MiSeq Reagent Kit V3 (150 cycles) (Illumina, Cat#MS-102-3001).

## 600 **Bulk cell CUT&RUN**

601 Bulk cell CUT&RUN was performed in the same manner as snCUT&RUN with the  
602 following alterations. After incubating with pA-MN, cells were washed twice in BSB followed by  
603 one wash in Low Salt buffer. After pelleting, most of the supernatant was removed leaving a small  
604 volume and the pellet suspended to a slurry by gentle agitation. 37  $\mu$ l calcium buffer was added to  
605 activate pA-MN and the samples incubated in a pre-chilled heat-block in ice-water for 30 min. The  
606 reaction was stopped by adding 12.5  $\mu$ l 4X STOP Buffer and nucleosomes allowed to diffuse for 30

607 min at 37°C. 50 µl was removed to a PCR tube containing 10 µl 1X End Repair and A-Tailing  
608 Buffer/Enzyme Mix (KAPA Hyper Prep Kit, Cat# 07962363001), then incubated at 12°C for 15 min,  
609 37°C for 15 min, 58°C for 90 min, followed by 8°C on hold. 5 µl 15 mM TruSeq DNA Single Indexes  
610 (SKU 20015960) and 45µl 1X KAPA Hyper Prep Enzyme/Buffer mix were added to each sample  
611 and incubated for 16 hours at 4°C. 2 µl 10% SDS plus 2 µl proteinase K (Thermo Fisher Scientific,  
612 Cat# EO0492) were added and incubated for 60 min 37°C. Excess adapters and adapter dimers were  
613 removed via two successive washes with SPRI beads. 110 µl SPRI beads (MagBio Genomics, Cat#  
614 AC-60050) were added to each sample and incubated for 15 min at room temperature. Beads were  
615 magnetically separated and washed twice with 80% ethanol. After air drying for 5 min, DNA was  
616 eluted from the beads by suspended in 50 µl 10 mM Tris pH 8.0. DNA was re-bound to the beads by  
617 adding 60 µl 20% PEG 8000, 2.5 M NaCl and incubating for 15 min. Beads were separated and  
618 washed as before, then suspended in 20 µl 10 mM Tris pH 8.0. To each purified library, 25 µl 2X  
619 KAPA HiFi HotStart ReadyMix added plus 5 µl TruSeq single index PCR Primer Cocktail. PCR was  
620 performed using the following cycling conditions: 98°C for 45s; 12 cycles of 98°C for 15 s, 60°C for  
621 10 s; 72°C 1 min, 8°C on hold. Bulk cell libraries were purified using two successive rounds of SPRI  
622 bead purification as above, using 1:1.1 then 1:1.2 ratios of sample to beads, and eluting with 20 µl  
623 10 mM Tris pH 8.0.

### 624

### 625 **snCUT&RUN data preprocessing and QC measurements**

626 Raw .fastqs of single-cells were mapped to the human hg38 reference genome with bowtie2  
627 (Langmead and Salzberg 2012, 2) v2.3.5.1 and the following settings: --end-to-end --very-sensitive  
628 --no-mixed --no-discordant -q --phred33 -I 10 -X 700. The MarkDuplicates tool from GATK v4.1.4.1  
629 (McKenna et al. 2010) was used to mark and remove duplicate reads while samtools v1.10 (Li et al.  
630 2009) was used to index the bam files. Bedtools v2.27.1 (Quinlan and Hall 2010) was used to convert  
631 .bam files to .beds and .bedgraphs. The unique number of UMRs was calculated by first converting  
632 the deduplicated single cell .bam file to a .bed file, which in turn was used to create a TagAlign file.  
633 The number of paired-end reads in the TagAlign file was then counted as the number of UMRs. To

634 calculate the fraction reads in peaks, we first merged the single-cell data into pseudobulk, and then  
635 normalized based on the sample with the lowest read number. We then called peaks using MACS2  
636 with the following settings: BAMPE --nomodel -B -p 5e-2 --min-length 500 --max-gap 400 --SPMR  
637 --call-summits. The fraction of reads that overlap the called peaks was then divided by the total  
638 number of reads to calculate the FRiP. Equally, we calculated the fraction of peaks in blacklisted  
639 genomic regions (Amemiya et al. 2019).

640

### 641 **Signac/Seurat analysis**

642 To create Signac fragment files, individual single-cell .bam files were first processed into  
643 .bed files with the following columns: chr, start, end, cell barcode, and a fifth column with the number  
644 1, representing that each row combination only occurred once. Individual bed files were concatenated  
645 and sorted with bedtools and indexed with tabix. Data from H3K4me3 and H3K27ac were processed  
646 separately. The fragment file was then converted to a sparse bin matrix with Signac's  
647 GenomeBinMatrix() function in R4.0, specifying binsize of 10kb. Subsequently, the bin matrix was  
648 used to create a chromatin assay in Signac. Cells were excluded from analysis with the following  
649 criteria: UMRs < 1,000; UMRs > 100,000; FRiP < 0.25; fraction reads in blacklist > 0.01;  
650 nucleosome signal > 5 and TSS enrichment score < 0.5. Signac standard analysis was performed  
651 downstream. Briefly, the matrix was normalized with term frequency inverse document frequency  
652 (TF-IDF), and singular value decomposition (SVD) was applied. UMAP embedding was done with  
653 the following settings: umap.method = "uwot", n.neighbors = 10, metric = "manhattan", n.epochs =  
654 500, min.dist = 0.1, spread = 1, set.op.mix.ratio = 1, reduction = 'lsi', dims = 2:30. MACS2 peaks  
655 were called with the CallPeaks() function, specifying the broad and combine.peaks options set to  
656 TRUE, BAMPE --nomodel -B -p 5e-2 --min-length 500 --max-gap 400 --SPMR --call-summits. Peak  
657 calls were visualized with the CoveragePlot() function. To perform motif analysis, first a PFMatrix  
658 object was retrieved from the JASPAR2020 package (Fornes et al. 2020). A peak matrix was then  
659 created using the fragment files and peak calls. Subsequently the AddMotifs() function was used to  
660 construct a motif object containing motif information. ChromVAR deviation Z-scores were

661 calculated with the RunChromVAR function. Reactome pathway analysis of peaks was done with  
662 the rGREAT package v1.24.0 (McLean et al. 2010; Gu 2022). For this analysis, only peaks with  
663 differential p-value of  $<0.005$  were included.

### 664 **Bulk RNA-seq**

665 Total RNA was extracted with the Qiagen RNAeasy Plus Mini Kit (Cat. No. 74136) and  
666 quantified with NanoDrop. Triplicates for each cell line (using different passage number) were used.  
667 RNA-seq library preparation and directional mRNA-sequencing was carried out by NovogeneAIT.  
668 And adapted analytical workflow from (Love et al. 2019) was used for the analysis. Briefly,  
669 transcripts were quantified using Salmon (Patro et al. 2017) with hg38 genome and GENCODE  
670 version 38 as reference and default parameters. Quantified transcripts were imported to R with  
671 tximeta (Love et al. 2020) and differential analysis was performed with DESeq2 (Love et al. 2014),  
672 filtering out genes with less than 10 supporting reads. Z-scores were calculated with the scale()  
673 function after variance normalization with variance stabilizing transformation (VST) to account for  
674 count variations caused by highly expressed or lowly expressed genes. The resulting output is a  
675 matrix where rows represent genes, columns represent samples, and values represent Z-score. The  
676 mean Z-score of the three replicates was calculated as the representative Z-score for each individual  
677 PDC.  
678

### 679 **Whole exome sequencing**

680 WES data for HN120Pri, HN120Met, HN137Pri and HN137Met were done through  
681 MacroGen as part of an earlier study (in press), while WES for HN120PCR and HN137PCR was done  
682 through NovogeneAIT. In this case, the Agilent SureSelect V6 58 Mb kit was used for library  
683 preparation and samples were sequenced on an Illumina NovaSeq PE150 platform at 12Gb data/100X  
684 exome coverage. Raw WES data were processed through GATK best practices pipeline, and copy  
685 number segmentation and calling were done with CNVKit after normalizing read number to the  
686 lowest sample (HN137Met) (Talevich et al. 2016).  
687

688

689

## **Correlating gene copy number, gene chromatin state, and gene expression**

690

691

692

693

694

695

696

697

698

699

700

701

702

703

704

705

706

707

708

709

710

711

712

713

714

Single cell .bams were first aggregated into pseudobulk with samtools merge and processed with sorting and indexing. Next, to account for differences in signal arising due to differences in read number, we normalized the .bam files by downsampling reads to match the read number of the sample with the smallest read number. Normalized bams of pseudobulk aggregate H3K4me3 and H3K27ac, as well as bulk H3K27me3 data were used as input for ChromHMM v1.23 (Ernst and Kellis 2012), using hg38. ChromHMM is a multivariate Hidden Markov Model-based technique that can model the presence of multiple chromatin marks in the same region of the genome. It first uses the Baum-Welch algorithm to find ‘hidden chromatin states’, each state reflecting presence or absence of single or multiple histone marks. It then uses the forward-backward algorithm to calculate the posterior probability of a certain genomic region being in a particular chromatin state. Five states were deemed to be the optimal number of states after repeated analysis with multiple number of states. Output segment files were binned to 200bp windows with bedtools makewindows to allow for comparable analysis across multiple cell lines. To correlate ChromHMM state transitions and gene expression, ChromHMM 200bp genomic bin outputs were filtered to include only promoter regions (region of 2000bp upstream of TSS to 3000bp downstream of TSS) and correlated to the nearest gene with bedtools closest. The resulting output is a bed like file with the columns: chromosome, bin start, bin end, chromatin state, and gene. Gene symbols were used as identifier to connect gene chromatin state, gene copy number, gene expression. The Z-score matrix and CNVKit .call.cns output was used for the gene expression and gene CN data respectively. Genes with missing data (e.g. no gene expression or CNV data) were removed from analysis. To assign chromatin state from the 200bp ChromHMM output, we considered a gene to have an activating mark if more than 2 bins (400bp) have H3K4me3 signal, H3K27ac signal, or both. Genes were categorized as having activity of both marks if the modal chromatin state across all bins are H3K4me3+/H3K27ac+ or when there are similar proportion of H3K4me3+/H3K27ac- and H3K4me3-/H3K27ac+ bins (e.g. 40% H3K4me3+/H3K27ac- and 60% H3K4me3-/H3K27ac+ or vice versa). A gene is categorized as having single mark if more than 60%



715 of the bins were annotated as such by ChromHMM. For chromatin state transition analysis, bins that  
716 were unmodified in the primary state and which remained unmodified during progression were  
717 excluded from analysis. Alluvial plots were plotted with the R package ggalluvial (Brunson 2020).  
718 Barplots and boxplots were visualized with the R package ggplot2.

### 719 **HN120preMet and HN137prePCR analysis**

721 Differential marker peaks for each individual PDC were found through the  
722 FindAllMarkers() function of Seurat. The top-50 peaks were included as features for the “module”  
723 unique for each PDC. Subsequently, module scores were back calculated for each single cell with the  
724 AddChromatinModule() function. To plot the ternary plots, first individual module profiles of HN120  
725 and HN137 PDCs were separated. Next, normalized module score profiles of each individual cell  
726 were added up to 1 with the following formula:

$$727 S_{x\_norm} = \frac{S_x}{S_{PRI\_x} + S_{MET\_x} + S_{PCR\_x}}, \text{ whereby } S_x \text{ is the raw PRI or MET or PCR module score of that}$$

728 cell, and  $S_{(x\_norm)}$  is the normalized PRI or MET or PCR score for that cell. If there were negative  
729 values, the absolute value of the lowest negative value was added to the PRI/MET/PCR scores. The  
730 package ggtern (Hamilton and Ferry 2018) was then used to visualize the normalized module scores.  
731 For HN120Pri, cells were categorized as preMet if cells have a PRI/MET/PCR normalized module  
732 score ratio of  $>0.4$  Pri and  $>0.4$  Met. For HN137Pri, cells were relabeled as HN137prePCR if cells  
733 have a PRI/MET/PCR normalized module score ratio of  $>0.4$  Pri /  $<0.4$  PCR. The ggplot package  
734 and the geom\_smooth() function was used to calculate the linear regression between HN120Pri and  
735 HN120Met module scores with UMR and FRiP.

### 736 **Statistical analysis**

738 All statistical analysis was done with R4.0. The two-sided Wilcoxon test from the  
739 stat\_compare\_means function of the ggpubr package was used to calculate statistical significance of  
740 either module scores, UMRs, or FRiP between different PDCCs. A linear regression model was used

741 to analyze the statistical relationship between HN120Met module score and FRiP and UMR. P-values  
742 as indicated: \*,  $p \leq 0.05$ ; \*\*,  $p \leq 0.01$ ; \*\*\*,  $p \leq 0.001$ ; \*\*\*\*,  $p \leq 0.0001$ .

#### 746 **Data access**

747 The datasets supporting the conclusions of this article are available in the NCBI GEO  
748 repository, under the accession number [GSE212250](https://www.ncbi.nlm.nih.gov/geo/query/acc.cgi?acc=GSE212250)  
749 (<https://www.ncbi.nlm.nih.gov/geo/query/acc.cgi?acc=GSE212250>). The code used in this study  
750 are available on Github: <https://github.com/dmuliaditan/sncutnrun>. Figures 1A and 4F were created  
751 with Biorender ([www.biorender.com](http://www.biorender.com)) under publication license HI248I94WF and GS26ET99NE  
752 respectively.

#### 754 **Competing interest statement**

755 The authors declare no competing interests.

#### 757 **Acknowledgments**

758 We thank the members of the DasGupta and Cheow labs for helpful discussion. We also  
759 thank Xiaoning Wang from the NUS Medicine Flow Cytometry Laboratory for assistance and  
760 advice on cell sorting and analysis. This work is supported by a grant from the National Medical  
761 Research Council (Singapore) (MOH-000219).

762 Author's contributions: Conceptualization: HJW, RD, LFC. Methodology: HJW, DM.  
763 Supervision: RD, LFC. Writing: HJW, RD, RD, LFC.

764 Author Information: Howard J. Womersley and Daniel Muliaditan are co-first authors of this  
765 study.

768

769

770

771

772

## References

773

774

Ai S, Xiong H, Li CC, Luo Y, Shi Q, Liu Y, Yu X, Li C, He A. 2019. Profiling chromatin states using single-cell HiChIP-seq. *Nat Cell Biol* **21**: 1164–1172.

775

776

Amemiya HM, Kundaje A, Boyle AP. 2019. The ENCODE Blacklist: Identification of Problematic Regions of the Genome. *Sci Rep* **9**: 9354.

777

778

Brock A, Chang H, Huang S. 2009. Non-genetic heterogeneity — a mutation-independent driving force for the somatic evolution of tumours. *Nat Rev Genet* **10**: 336–342.

779

Brunson JC. 2020. ggalluvial: Layered Grammar for Alluvial Plots. *Journal of Open Source Software* **5**: 2017.

780

781

Carter B, Ku WL, Kang JY, Hu G, Perrie J, Tang Q, Zhao K. 2019. Mapping histone modifications in low cell number and single cells using antibody-guided chromatin tagmentation (ACT-seq). *Nat Commun* **10**: 3747.

782

783

784

Chia S, Low J-L, Zhang X, Kwang X-L, Chong F-T, Sharma A, Bertrand D, Toh SY, Leong H-S, Thangavelu MT, et al. 2017. ZPhenotype-driven precision oncology as a guide for clinical decisions one patient at a time. *Nat Commun* **8**: 1–12.

785

786

Choi J-H, Lee B-S, Jang JY, Lee YS, Kim HJ, Roh J, Shin YS, Woo HG, Kim C-H. 2023. Single-cell transcriptome profiling of the stepwise progression of head and neck cancer. *Nat Commun* **14**: 1055.

787

788

Easwaran H, Tsai H-C, Baylin SB. 2014. Cancer Epigenetics: Tumor Heterogeneity, Plasticity of Stem-like States, and Drug Resistance. *Molecular Cell* **54**: 716–727.

789

790

Ernst J, Kellis M. 2012. ChromHMM: automating chromatin state discovery and characterization. *Nat Methods* **9**: 215–216.

791

792

793

Fornes O, Castro-Mondragon JA, Khan A, van der Lee R, Zhang X, Richmond PA, Modi BP, Correard S, Gheorghe M, Baranašić D, et al. 2020. JASPAR 2020: update of the open-access database of transcription factor binding profiles. *Nucleic Acids Research* **48**: D87–D92.

794

Füllgrabe J, Kavanagh E, Joseph B. 2011. Histone onco-modifications. *Oncogene* **30**: 3391–3403.

795

796

797

Grosselin K, Durand A, Marsolier J, Poitou A, Marangoni E, Nemati F, Dahmani A, Lameiras S, Reyat F, Frenoy O, et al. 2019. High-throughput single-cell ChIP-seq identifies heterogeneity of chromatin states in breast cancer. *Nat Genet* **51**: 1060–1066.

798

799

Gu Z. 2022. rGREAT: Client for GREAT Analysis. <https://github.com/jokergoo/rGREAT>, <http://great.stanford.edu/public/html/>.

800

Guo M, Peng Y, Gao A, Du C, Herman JG. 2019. Epigenetic heterogeneity in cancer. *Biomark Res* **7**: 23.

801

802

Hainer SJ, Bošković A, McCannell KN, Rando OJ, Fazzio TG. 2019. Profiling of Pluripotency Factors in Single Cells and Early Embryos. *Cell* **177**: 1319–1329.e11.

- 803 Hamilton NE, Ferry M. 2018. ggtern: Ternary Diagrams Using ggplot2. *Journal of Statistical Software* **87**: 1–  
804 17.
- 805 Helin K, Dhanak D. 2013. Chromatin proteins and modifications as drug targets. *Nature* **502**: 480–488.
- 806 Hyun K, Jeon J, Park K, Kim J. 2017. Writing, erasing and reading histone lysine methylations. *Exp Mol Med*  
807 **49**: e324–e324.
- 808 Kakiuchi A, Kakuki T, Ohwada K, Kurose M, Kondoh A, Obata K, Nomura K, Miyata R, Kaneko Y, Konno  
809 T, et al. 2021. HDAC inhibitors suppress the proliferation, migration and invasiveness of human head and neck  
810 squamous cell carcinoma cells via p63-mediated tight junction molecules and p21-mediated growth arrest.  
811 *Oncol Rep* **45**: 46.
- 812 Kaya-Okur HS, Janssens DH, Henikoff JG, Ahmad K, Henikoff S. 2020. Efficient low-cost chromatin  
813 profiling with CUT&Tag. *Nature Protocols* **15**: 3264–3283.
- 814 Kaya-Okur HS, Wu SJ, Codomo CA, Pledger ES, Bryson TD, Henikoff JG, Ahmad K, Henikoff S. 2019.  
815 CUT&Tag for efficient epigenomic profiling of small samples and single cells. *Nature Communications* **10**.
- 816 Lamar JM, Stern P, Liu H, Schindler JW, Jiang Z-G, Hynes RO. 2012. The Hippo pathway target, YAP,  
817 promotes metastasis through its TEAD-interaction domain. *Proc Natl Acad Sci U S A* **109**: E2441-2450.
- 818 Langmead B, Salzberg SL. 2012. Fast gapped-read alignment with Bowtie 2. *Nat Methods* **9**: 357–359.
- 819 Li H, Handsaker B, Wysoker A, Fennell T, Ruan J, Homer N, Marth G, Abecasis G, Durbin R, 1000 Genome  
820 Project Data Processing Subgroup. 2009. The Sequence Alignment/Map format and SAMtools. *Bioinformatics*  
821 **25**: 2078–2079.
- 822 Litzenburger UM, Buenrostro JD, Wu B, Shen Y, Sheffield NC, Kathiria A, Greenleaf WJ, Chang HY. 2017.  
823 Single-cell epigenomic variability reveals functional cancer heterogeneity. *Genome Biol* **18**: 15.
- 824 Love MI, Anders S, Kim V, Huber W. 2019. RNA-seq workflow: gene-level exploratory analysis and  
825 differential expression.  
826 <https://master.bioconductor.org/packages/release/workflows/vignettes/rnaseqGene/inst/doc/rnaseqGene.html>.
- 827 Love MI, Huber W, Anders S. 2014. Moderated estimation of fold change and dispersion for RNA-seq data  
828 with DESeq2. *Genome Biology* **15**: 550.
- 829 Love MI, Soneson C, Hickey PF, Johnson LK, Pierce NT, Shepherd L, Morgan M, Patro R. 2020. Tximeta:  
830 Reference sequence checksums for provenance identification in RNA-seq. *PLOS Computational Biology* **16**:  
831 e1007664.
- 832 Matthias C, Mack B, Berghaus A, Gires O. 2008. Keratin 8 expression in head and neck epithelia. *BMC Cancer*  
833 **8**: 267.
- 834 McKenna A, Hanna M, Banks E, Sivachenko A, Cibulskis K, Kernytzky A, Garimella K, Altshuler D, Gabriel  
835 S, Daly M, et al. 2010. The Genome Analysis Toolkit: a MapReduce framework for analyzing next-generation  
836 DNA sequencing data. *Genome Res* **20**: 1297–1303.
- 837 McLean CY, Bristor D, Hiller M, Clarke SL, Schaar BT, Lowe CB, Wenger AM, Bejerano G. 2010. GREAT  
838 improves functional interpretation of cis-regulatory regions. *Nat Biotechnol* **28**: 495–501.
- 839 Meers MP, Bryson TD, Henikoff JG, Henikoff S. 2019. Improved CUT&RUN chromatin profiling tools. *eLife*  
840 **8**: e46314.
- 841 Minussi DC, Nicholson MD, Ye H, Davis A, Wang K, Baker T. 2021. Breast tumours maintain a reservoir of  
842 subclonal diversity during expansion. *Nature* **Apr;592(7853):302–8**.

- 843 Morton AR, Dogan-Artun N, Faber ZJ, MacLeod G, Bartels CF, Piazza MS, Allan KC, Mack SC, Wang X,  
844 Gimple RC, et al. 2019. Functional Enhancers Shape Extrachromosomal Oncogene Amplifications. *Cell* **179**:  
845 1330-1341.e13.
- 846 Omori H, Nishio M, Masuda M, Miyachi Y, Ueda F, Nakano T, Sato K, Mimori K, Taguchi K, Hikasa H, et  
847 al. 2020. YAP1 is a potent driver of the onset and progression of oral squamous cell carcinoma. *Science*  
848 *Advances* **6**: eaay3324.
- 849 Patro R, Duggal G, Love MI, Irizarry RA, Kingsford C. 2017. Salmon: fast and bias-aware quantification of  
850 transcript expression using dual-phase inference. *Nat Methods* **14**: 417–419.
- 851 Patty BJ, Hainer SJ. 2021. Transcription factor chromatin profiling genome-wide using uliCUT&RUN in  
852 single cells and individual blastocysts. *Nat Protoc* **16**: 2633–2666.
- 853 Pavón MA, Arroyo-Solera I, Téllez-Gabriel M, León X, Virós D, López M, Gallardo A, Céspedes MV,  
854 Casanova I, López-Pousa A, et al. 2015. Enhanced cell migration and apoptosis resistance may underlie the  
855 association between high SERPINE1 expression and poor outcome in head and neck carcinoma patients.  
856 *Oncotarget* **6**: 29016–29033.
- 857 Pisco AO, Huang S. 2015. Non-genetic cancer cell plasticity and therapy-induced stemness in tumour relapse:  
858 ‘What does not kill me strengthens me.’ *Br J Cancer* **112**: 1725–1732.
- 859 Puram SV, Tirosh I, Parikh AS, Patel AP, Yizhak K, Gillespie S, Rodman C, Luo CL, Mroz EA, Emerick KS,  
860 et al. 2017. Single-cell transcriptomic analysis of primary and metastatic tumor ecosystems in head and neck  
861 cancer. *Cell* **171**: 1611-1624.e24.
- 862 Qi Z, Liu Y, Mints M, Mullins R, Sample R, Law T, Barrett T, Mazul AL, Jackson RS, Kang SY, et al. 2021.  
863 Single-Cell Deconvolution of Head and Neck Squamous Cell Carcinoma. *Cancers* **13**: 1230.
- 864 Qu J, Tanis SEJ, Smits JPH, Kouwenhoven EN, Oti M, van den Bogaard EH, Logie C, Stunnenberg HG, van  
865 Bokhoven H, Mulder KW, et al. 2018. Mutant p63 Affects Epidermal Cell Identity through Rewiring the  
866 Enhancer Landscape. *Cell Rep* **25**: 3490-3503.e4.
- 867 Quah HS, Cao EY, Suteja L, Li CH, Leong HS, Chong FT, Gupta S, Arcinas C, Ouyang JF, Ang V, et al.  
868 2023. Single cell analysis in head and neck cancer reveals potential immune evasion mechanisms during early  
869 metastasis. *Nat Commun* **14**: 1680.
- 870 Quinlan AR, Hall IM. 2010. BEDTools: a flexible suite of utilities for comparing genomic features.  
871 *Bioinformatics* **26**: 841–842.
- 872 Ruiz-Villalba A, van Pelt-Verkuil E, Gunst QD, Ruijter JM, van den Hoff MJ. 2017. Amplification of  
873 nonspecific products in quantitative polymerase chain reactions (qPCR). *Biomolecular Detection and*  
874 *Quantification* **14**: 7–18.
- 875 Segre JA, Bauer C, Fuchs E. 1999. Klf4 is a transcription factor required for establishing the barrier function  
876 of the skin. *Nat Genet* **22**: 356–360.
- 877 Sharma A, Cao EY, Kumar V, Zhang X, Leong HS, Wong AML, Ramakrishnan N, Hakimullah M, Teo HMV,  
878 Chong FT, et al. 2018. Longitudinal single-cell RNA sequencing of patient-derived primary cells reveals drug-  
879 induced infidelity in stem cell hierarchy. *Nat Commun* **9**: 4931.
- 880 Shin E, Kim J. 2020. The potential role of YAP in head and neck squamous cell carcinoma. *Exp Mol Med* **52**:  
881 1264–1274.
- 882 Skene PJ, Henikoff JG, Henikoff S. 2018. Targeted in situ genome-wide profiling with high efficiency for low  
883 cell numbers. *Nature Protocols* **13**: 1006–1019.

- 884 Skene PJ, Henikoff S. 2017. An efficient targeted nuclease strategy for high-resolution mapping of DNA  
885 binding sites. *eLife* **16**: e21856-undefined.
- 886 Stuart T, Butler A, Hoffman P, Hafemeister C, Papalexi E, Mauck WM, Hao Y, Stoeckius M, Smibert P, Satija  
887 R. 2019. Comprehensive integration of single-cell data. *Cell* **177**: 1888-1902.e21.
- 888 Stuart T, Srivastava A, Madad S, Lareau CA, Satija R. 2021. Single-cell chromatin state analysis with Signac.  
889 *Nat Methods* **18**: 1333–1341.
- 890 Talevich E, Shain AH, Botton T, Bastian BC. 2016. CNVkit: Genome-Wide Copy Number Detection and  
891 Visualization from Targeted DNA Sequencing. *PLoS Computational Biology* **12**: e1004873.
- 892 Valencia-Sama I, Zhao Y, Lai D, Janse van Rensburg HJ, Hao Y, Yang X. 2015. Hippo Component TAZ  
893 Functions as a Co-repressor and Negatively Regulates  $\Delta$ Np63 Transcription through TEA Domain (TEAD)  
894 Transcription Factor. *J Biol Chem* **290**: 16906–16917.
- 895 Wang Q, Xiong H, Ai S, Yu X, Liu Y, Zhang J, He A. 2019. CoBATCH for High-Throughput Single-Cell  
896 Epigenomic Profiling. *Molecular Cell* **76**: 206-216.e7.
- 897 Wang R, Xin M, Li Y, Zhang P, Zhang M. 2016. The Functions of Histone Modification Enzymes in Cancer.  
898 *CPPS* **17**: 438–445.
- 899 Wang Y, Dong C, Zhou BP. 2020. Metabolic reprogram associated with epithelial-mesenchymal transition in  
900 tumor progression and metastasis. *Genes Dis* **7**: 172–184.
- 901 Wu S, Turner KM, Nguyen N, Raviram R, Erb M, Santini J, Luebeck J, Rajkumar U, Diao Y, Li B, et al. 2019.  
902 Circular ecDNA promotes accessible chromatin and high oncogene expression. *Nature* **575**: 699–703.

903
